# Supplementary material for: New Particle Formation at a High Altitude Site in India:Impact of Fresh Emissions and Long Range Transport
Source: Copernicus journal article supplement (doi:10.5194/acp-2018-637), 2018-07-02
Supplement: Supplementary file 1 [file acp-2018-637-supplement.pdf]

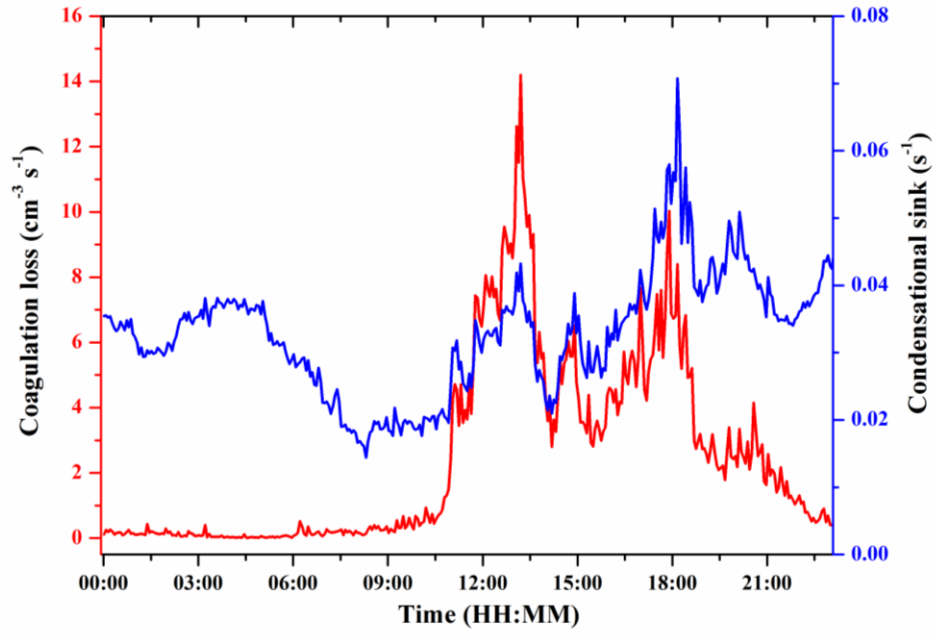

Figure S1: Diurnal variation of NPF event characteristics (a) Condensational Sink and (b) Coagulation loss during December 12, 2016.

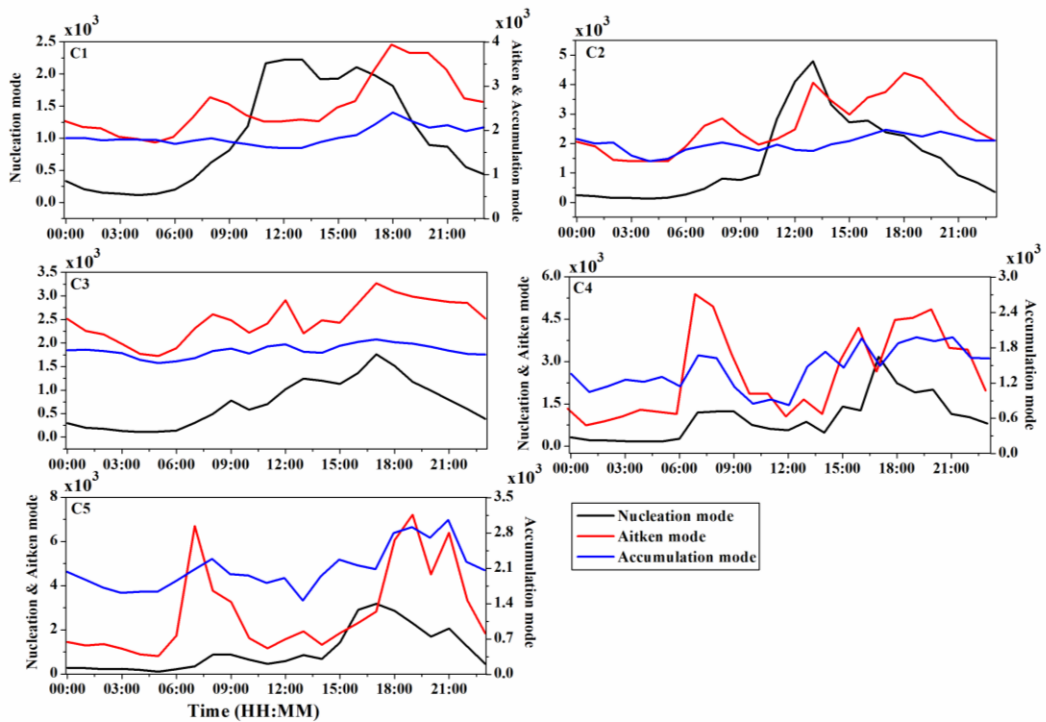

Figure S2: Diurnal Variation of particle number concentration in three modes - nucleation, aitenk and accumulation mode for each cluster.

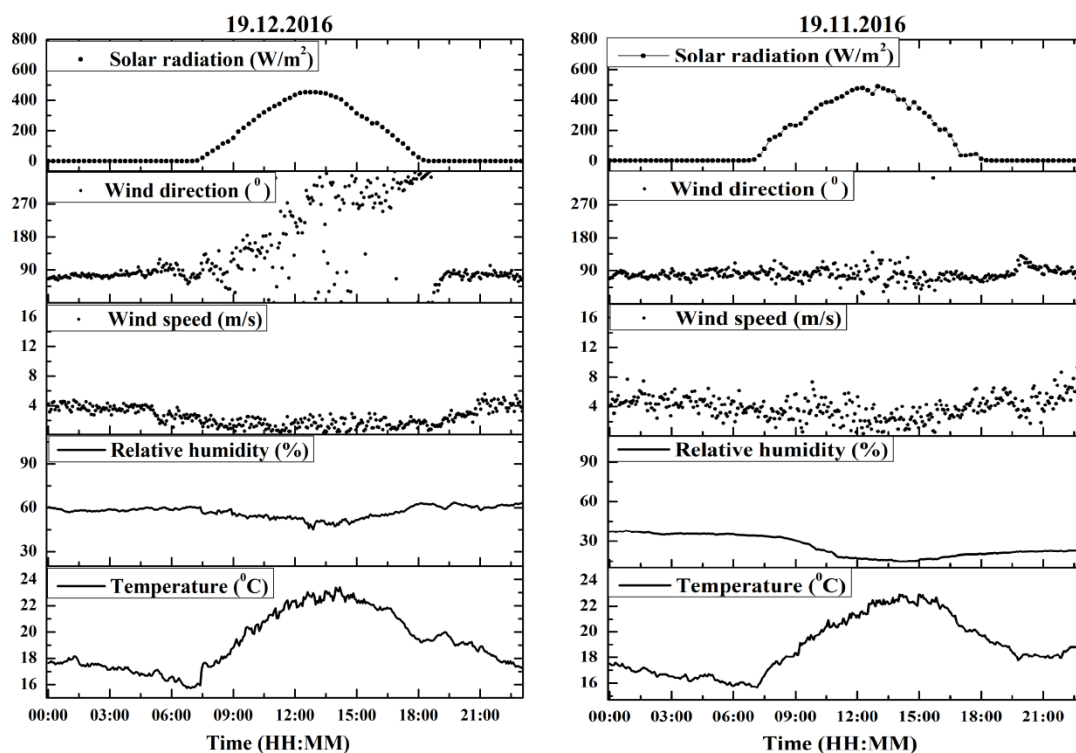

Figure S3: Diurnal variation of meteorological conditions - Solar radiation (SR), Wind direction (WD), Wind speed (WS), Relative Humidity (RH) and Temperature (T) on a non-NPF day - 19<sup>th</sup> December 2016 (left panel) and a weak-NPF day - 19<sup>th</sup> November 2016 (right panel)

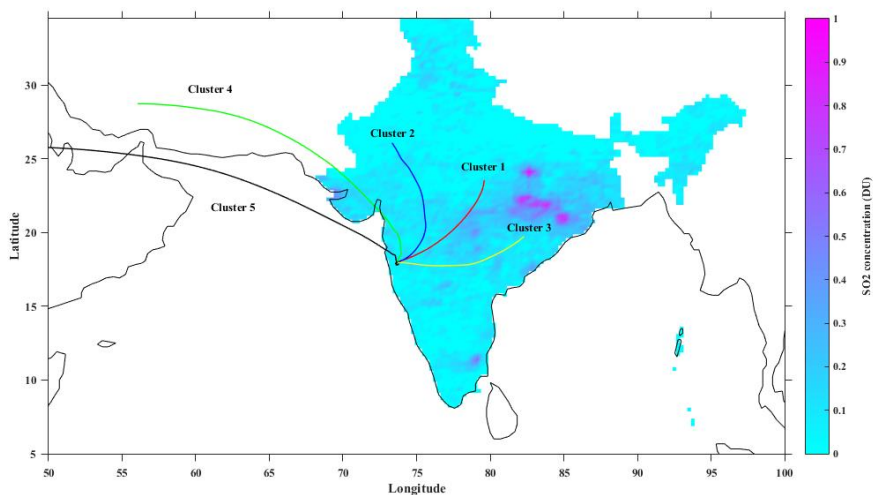

Figure S4: The spatial distribution ( $0.25 \text{ deg} \times 0.25 \text{ deg}$ ) of  $\text{SO}_2$  emissions (vertical column density) over the Indian region from November 2016 to February 2017. The data was extracted from the OMI satellite (<http://giovanni.sci.gsfc.nasa.gov/>). Clusters C1-C4 (from Figure 4) are also depicted in the figure.
